# Supplementary material for: Unimodal sized silica nanocapsules produced through water-in-oil emulsions prepared by sequential irradiation of kilo- and submega-hertz ultrasounds
Source: Royal Society of Chemistry journal article supplement (doi:10.1039/d1ra03384k), 2021-01-01
Supplement: d1ra03384k1.pdf [file d1ra03384k1.pdf]

## Electronic Supplementary Information (ESI)

Unimodal sized silica nanocapsules produced through water-in-oil emulsions prepared by sequential irradiation of kilo- and submega-hertz ultrasounds

Takahiro Nemoto,<sup>a</sup> Toshio Sakai,<sup>a</sup> and Tomohiko Okada<sup>\*,a,b</sup>

<sup>a</sup>Department of Materials Chemistry, Faculty of Engineering, Shinshu University

<sup>b</sup>Research Initiative for Supra-Materials, Shinshu University

\* corresponding author: [tomohiko@shinshu-u.ac.jp](mailto:tomohiko@shinshu-u.ac.jp)

Address: 4-17-1, Wakasato, Nagano 380-8553, Japan

Tel. +81-26-269-5414 Fax: +81-26-269-5424

ORCID: 0000-0002-9361-7004

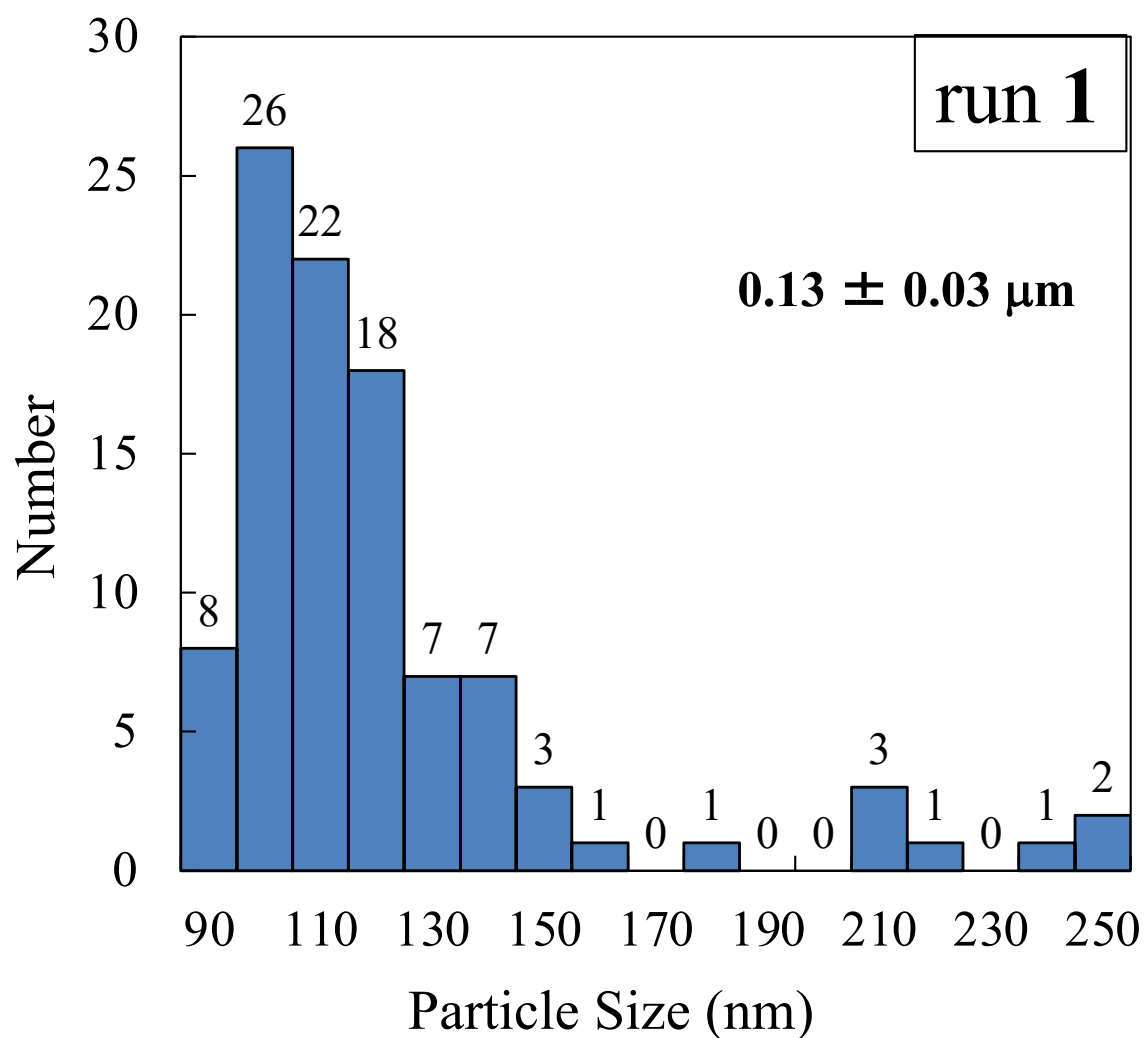

**Fig. S1.** Particle size distribution of the product obtained after the addition of 1.9 mmol-MTCS to the 0.10 mL-water dispersing soybean oil emulsion, which was prepared through the sequential ultrasound irradiation in 1 cycle

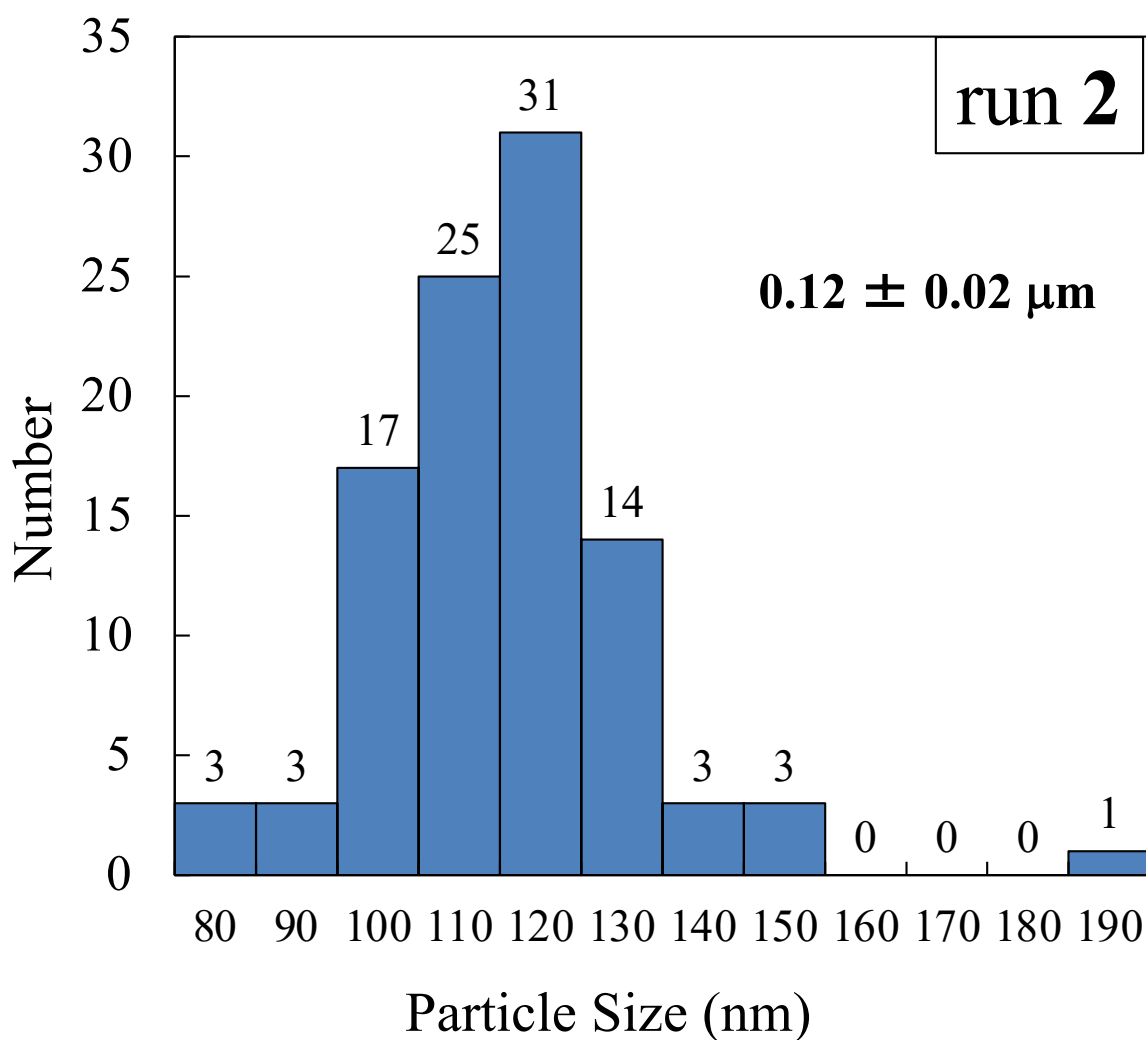

**Fig. S2.** Particle size distribution of the product obtained after the addition of 1.9 mmol-MTCS to the 0.10 mL-water dispersing soybean oil emulsion, which was prepared through the sequential ultrasound irradiation in 3 cycles

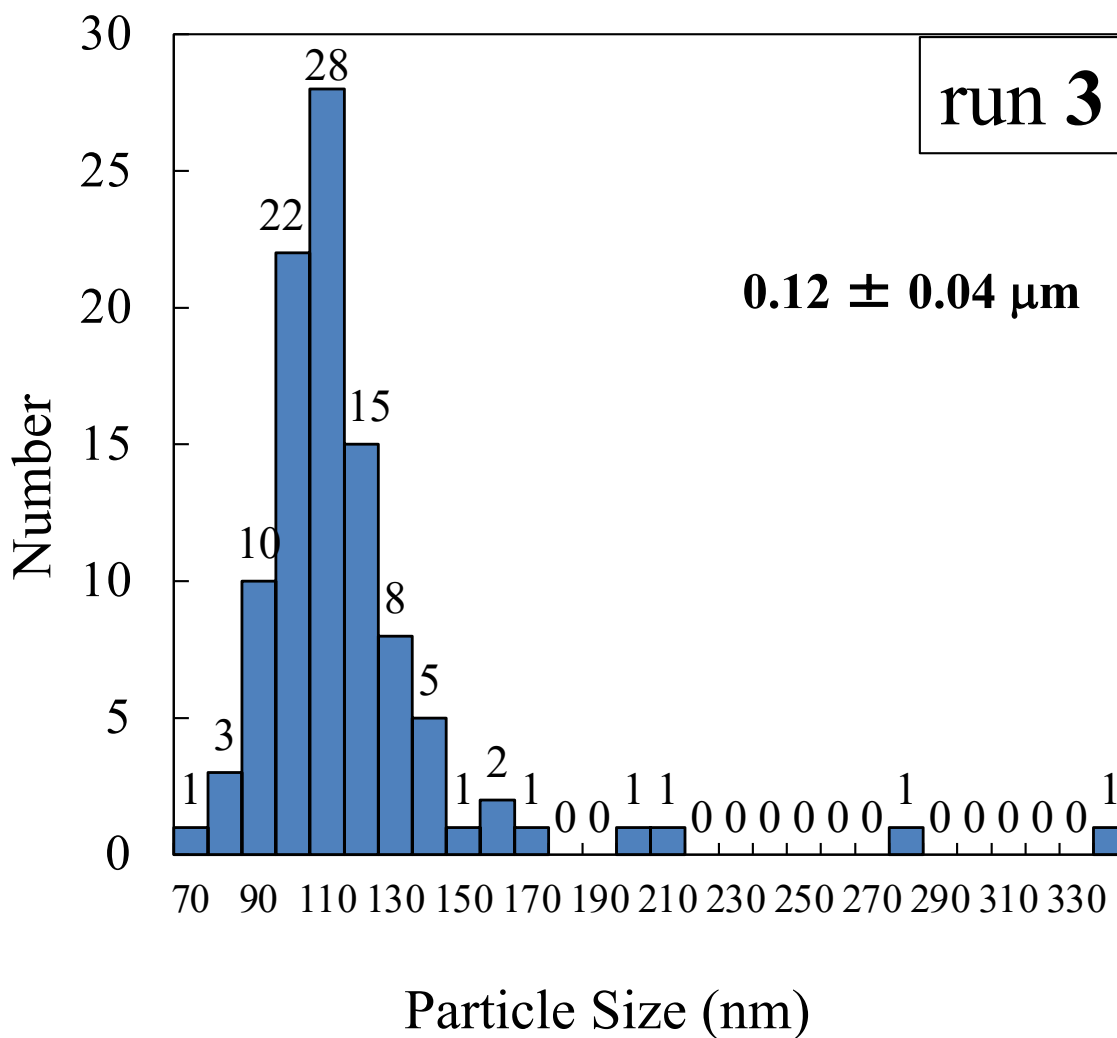

**Fig. S3.** Particle size distribution of the product obtained after the addition of 1.9 mmol-MTCS to the 0.10 mL-water dispersing soybean oil emulsion, which was prepared through the sequential ultrasound irradiation in 5 cycles

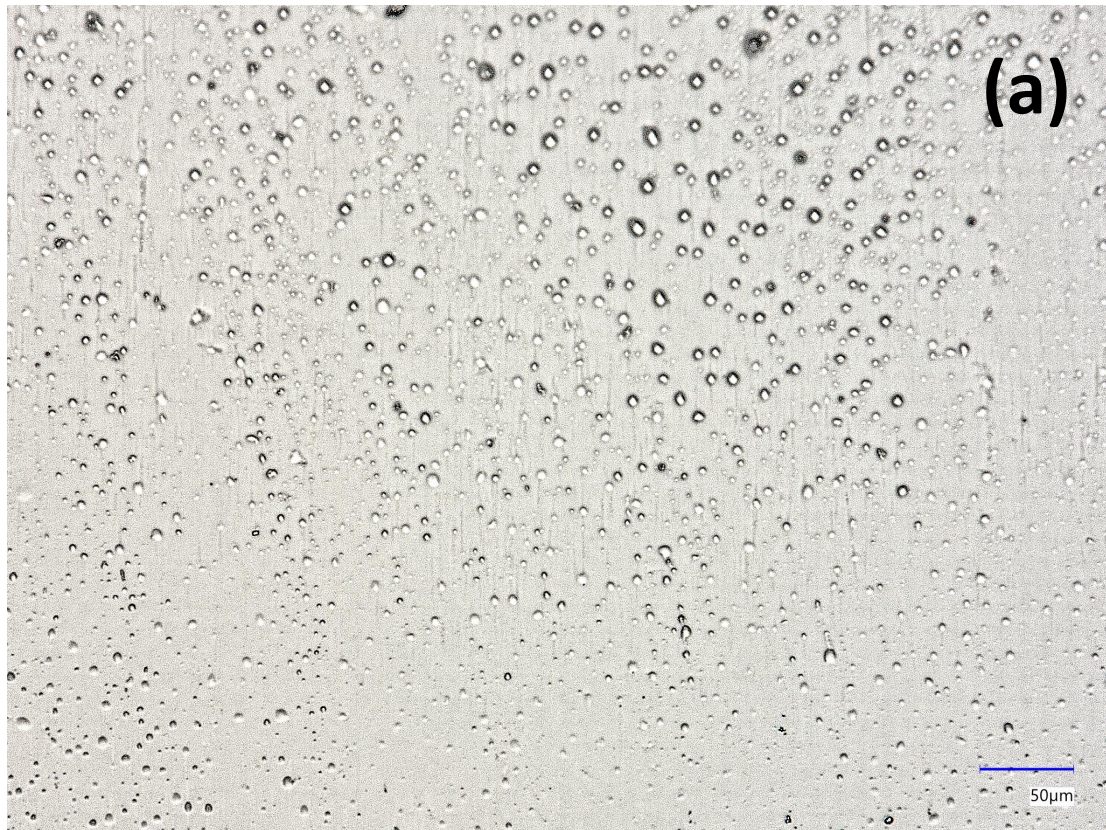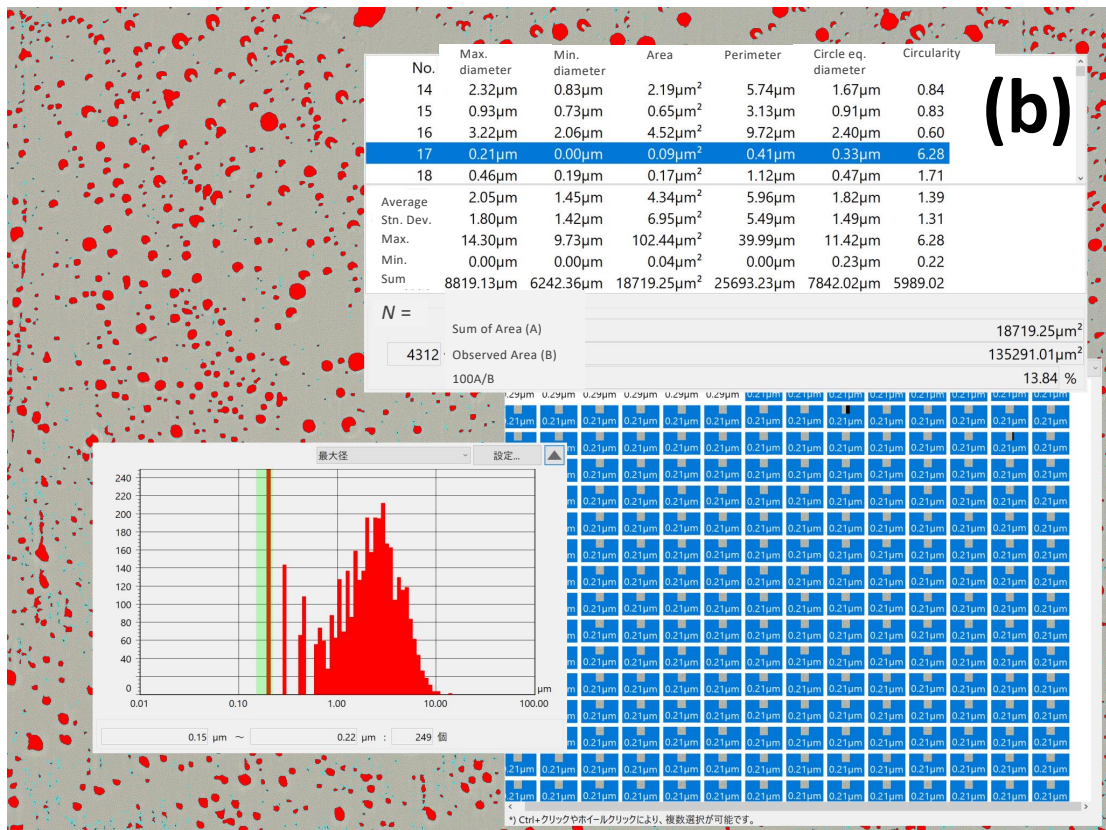

**Fig. S4.** (a) Optical microscope image of mixture of 0.10 mL-water with 50 mL-soybean oil prepared in 3 cycles of the sequential ultrasound irradiation: (b) The size distribution of water droplets has been provided with thresholding the top image (red area) for the number of 4312 droplets

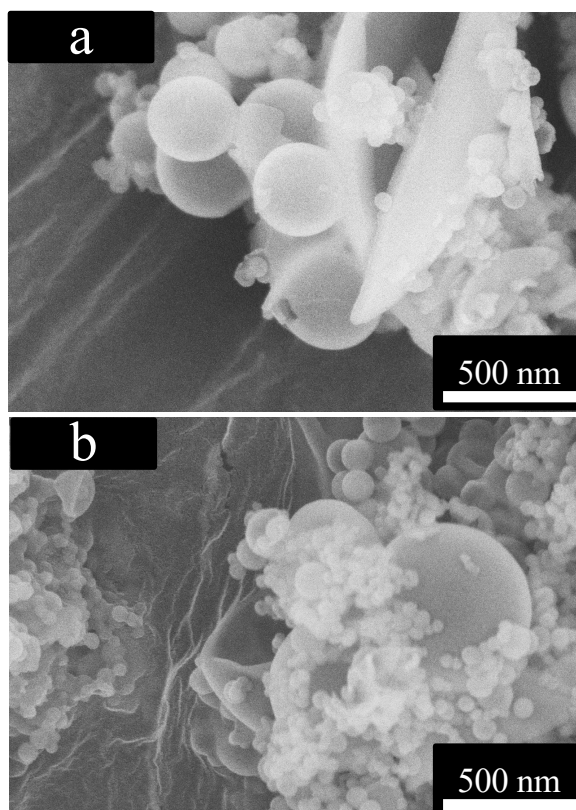

**Fig. S5.** SEM images of the products using W/O emulsion (dispersing 1.0 mL-water) prepared in 3 cycles of the sequential ultrasound irradiation. Parts (a) and (b) are of the products obtained after reacting 1.9 mmol-MTCS at 30 and 60 min after irradiating these acoustic waves

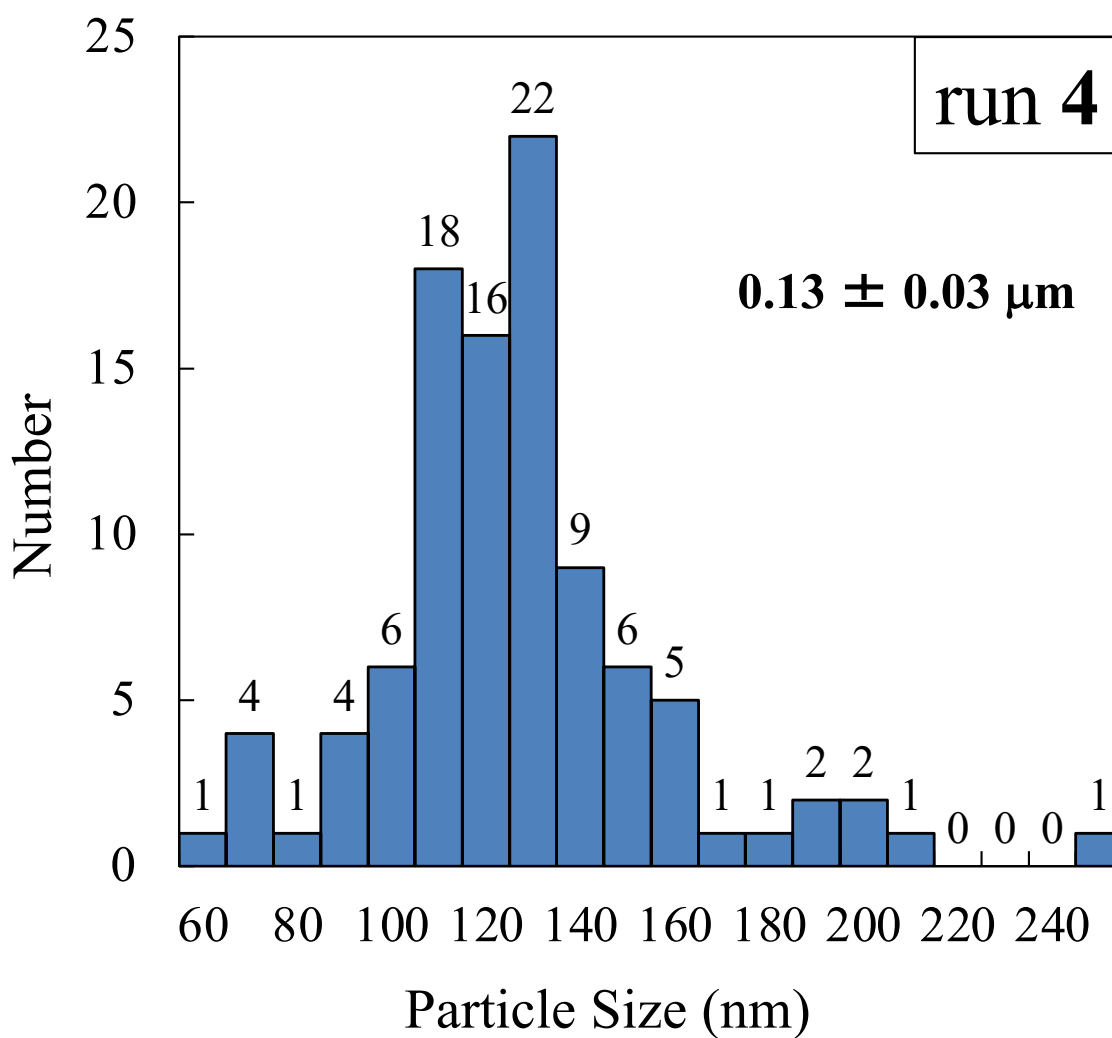

**Fig. S6.** Particle size distribution of the product obtained after the addition of 9.3 mmol-MTCS to the 0.50 mL-water dispersing soybean oil emulsion, which was prepared through the sequential ultrasound irradiation in 3 cycles

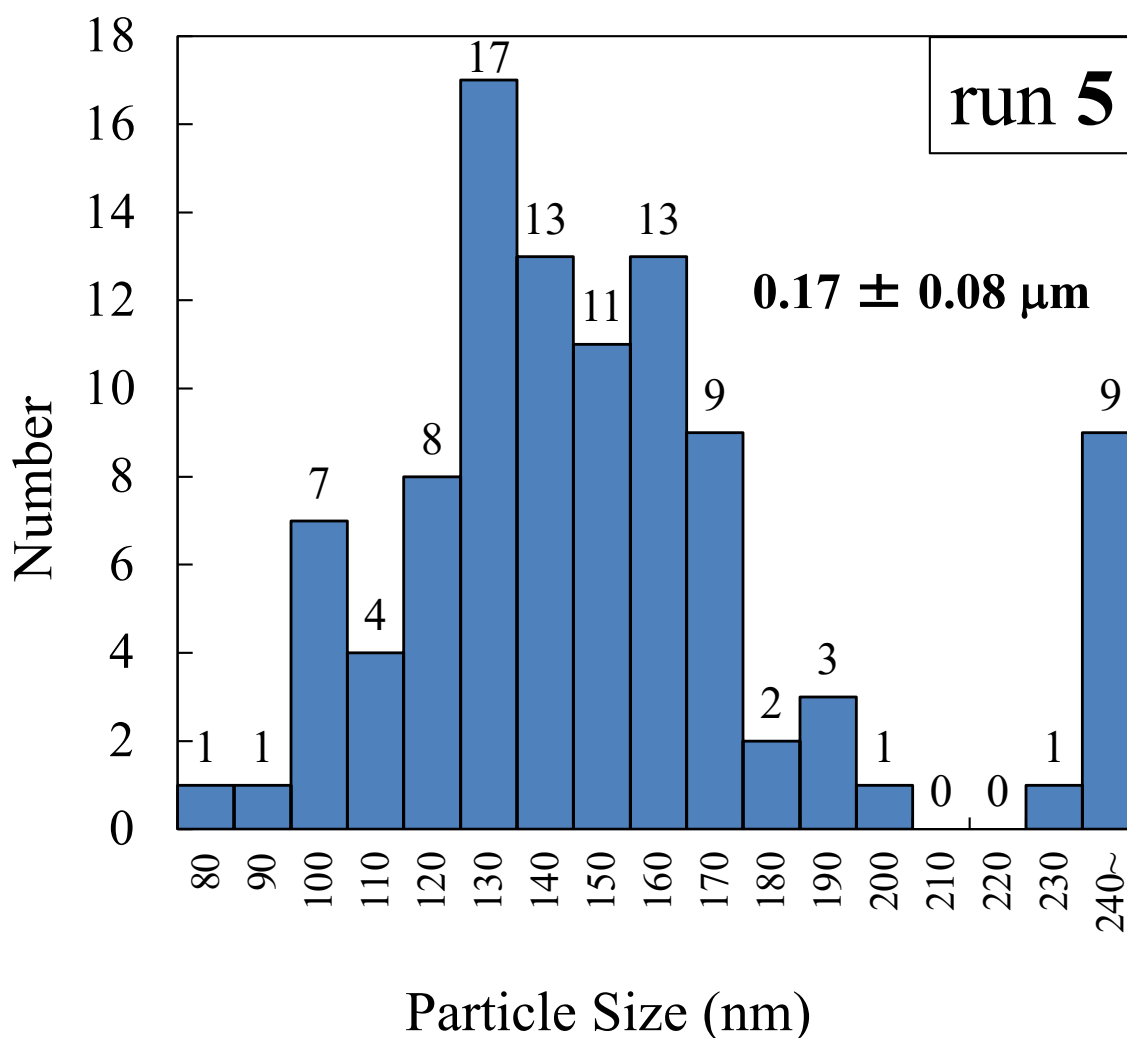

**Fig. S7.** Particle size distribution of the product obtained after the addition of 18 mmol-MTCS to the 0.97 mL-water dispersing soybean oil emulsion, which was prepared through the sequential ultrasound irradiation in 3 cycles



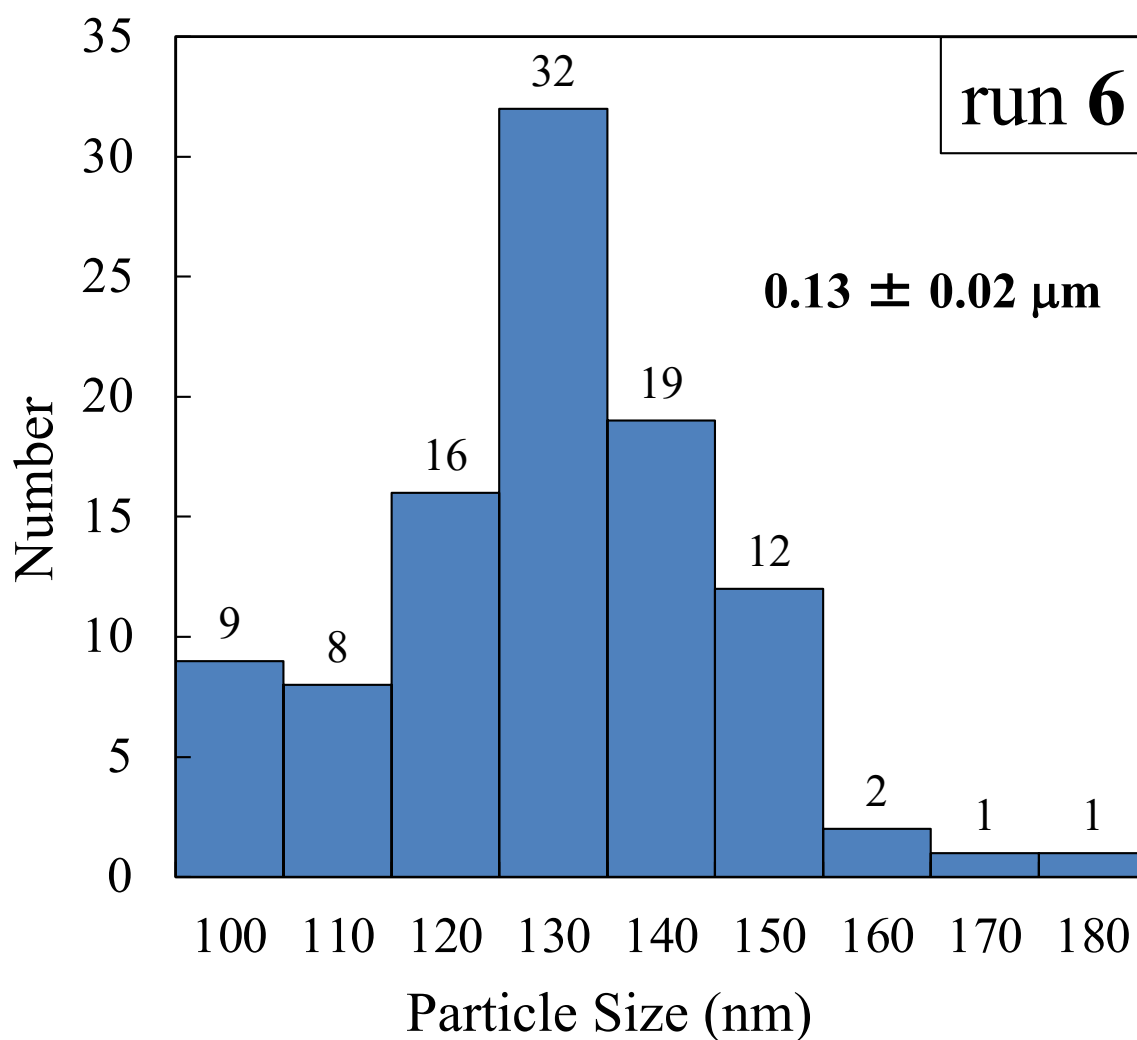

**Fig. S8.** Particle size distribution of the product obtained after the addition of 21 mmol-MTCS to the 0.97 mL-water dispersing soybean oil emulsion, which was prepared through the sequential ultrasound irradiation in 3 cycles

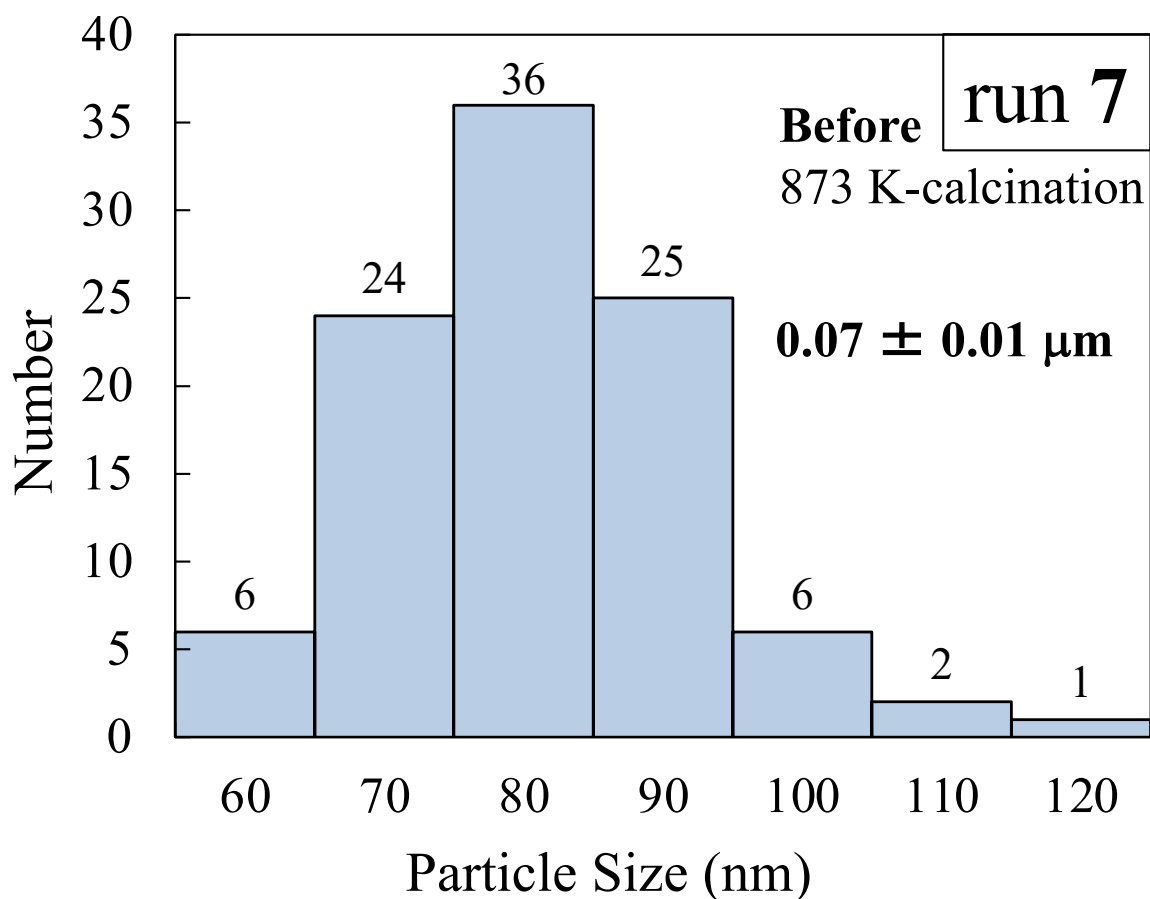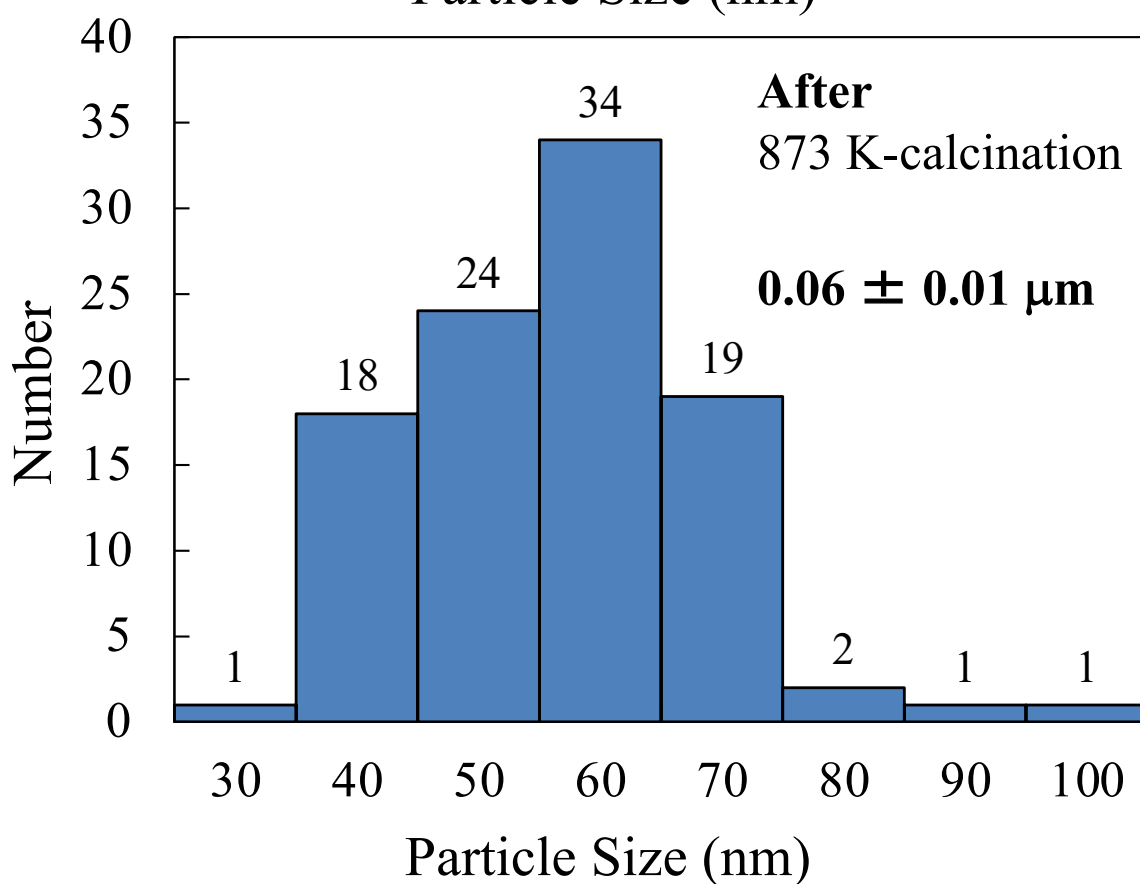

**Fig. S9.** Particle size distributions of the products obtained after the addition of 0.93 mmol-MTCS to the 0.05 mL-water dispersing soybean oil emulsion, which was prepared through the sequential ultrasound irradiation in 3 cycles. Top and bottom panels show before and after calcination at 873 K, respectively

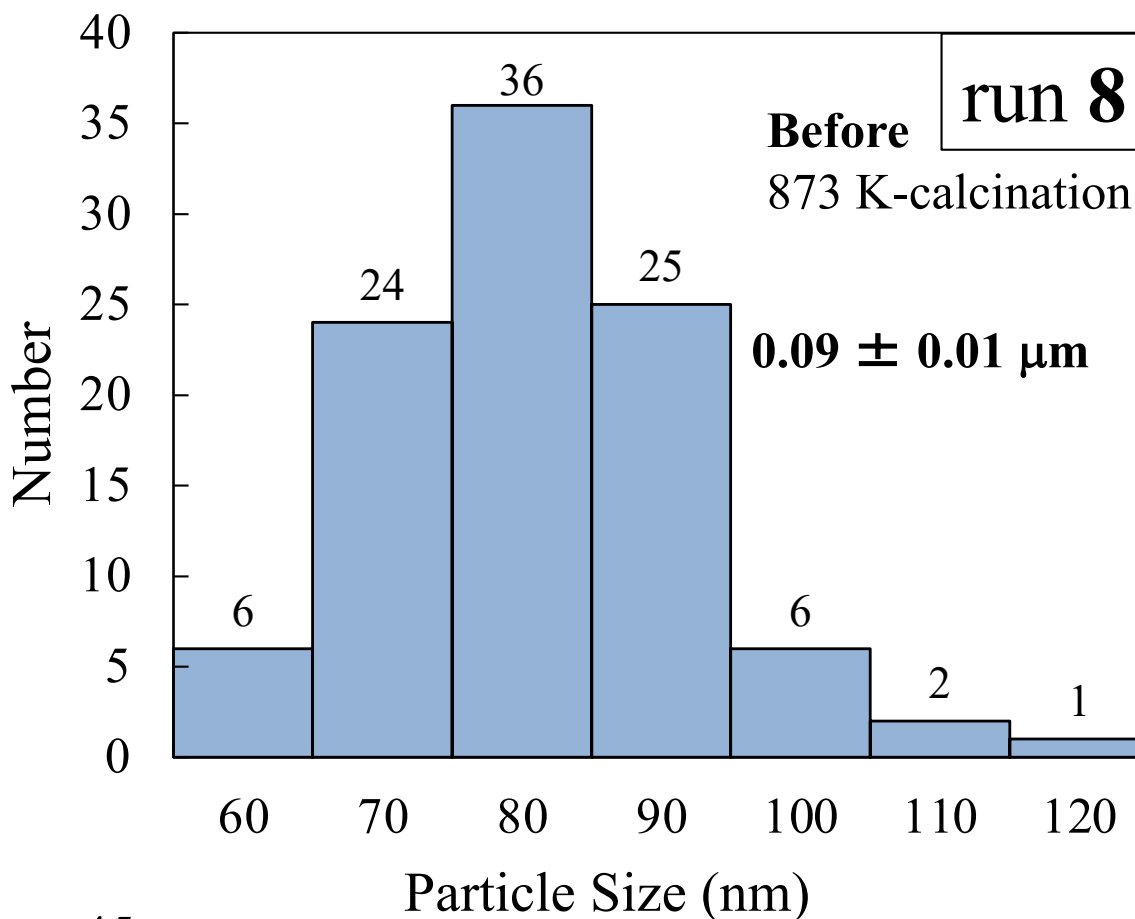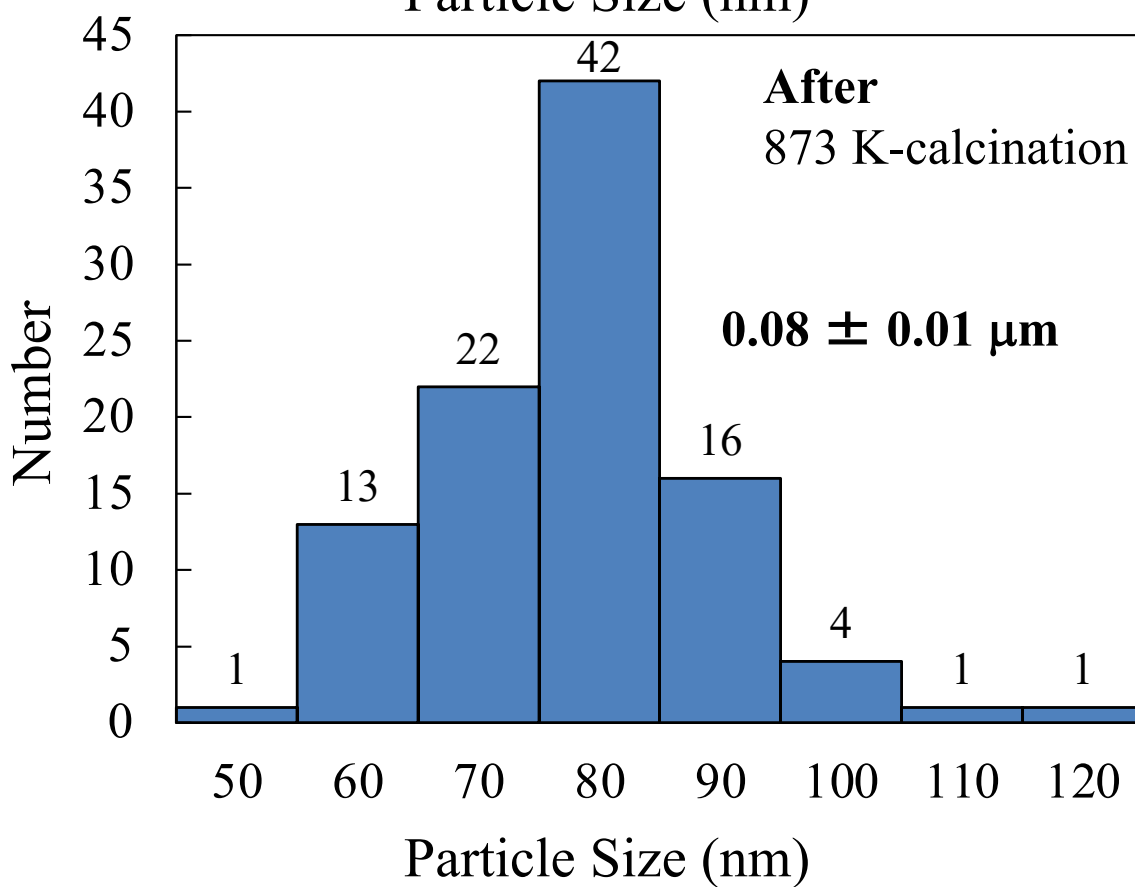

**Fig. S10.** Particle size distributions of the products obtained after the addition of 0.70 mmol-MTCS to the 0.05 mL-water dispersing soybean oil emulsion, which was prepared through the sequential ultrasound irradiation in 3 cycles. Top and bottom panels show before and after calcination at 873 K, respectively
